# Supplementary material for: Causes of under-five child Mortality in Tigray Region, North Ethiopia A retrospective verbal autopsy study
Source: Research Square preprint supplement (doi:10.21203/rs.3.rs-7545655/v1), 2025-10-23
Supplement: Supplementary file 1 [file 456a60ced196cca40f76274b.pdf]

# Verbal autopsy standards:

The 2012 WHO verbal autopsy instrument

Release Candidate 1

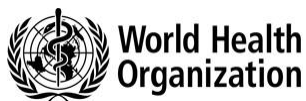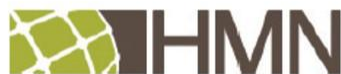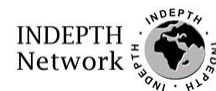



# **2012 WHO VERBAL AUTOPSY SAMPLE QUESTIONNAIRE 1**

*Death of a child Under 4 weeks (0-28 days)*

| DEATH OF A CHILD AGED UNDER 4 WEEKS (28 DAYS)                              |                                                                                                                                                                                                                                                         |
|----------------------------------------------------------------------------|---------------------------------------------------------------------------------------------------------------------------------------------------------------------------------------------------------------------------------------------------------|
| NO.                                                                        | QUESTIONS AND FILTERS                                                                                                                                                                                                                                   |
| CODING CATEGORIES                                                          |                                                                                                                                                                                                                                                         |
| <b>SECTION 1. BASIC INFORMATION ABOUT THE INTERVIEW AND THE RESPONDENT</b> |                                                                                                                                                                                                                                                         |
| 2A120                                                                      | Name of verbal autopsy interviewer:<br>Surname _____<br>Name _____                                                                                                                                                                                      |
| 2A140                                                                      | RECORD THE DATE OF INTERVIEW<br>DAY <input type="text"/> <input type="text"/><br>MONTH <input type="text"/> <input type="text"/><br>YEAR <input type="text"/> <input type="text"/> <input type="text"/> <input type="text"/>                            |
| 2A130                                                                      | RECORD THE TIME AT START OF INTERVIEW<br>MORNING/EVENING <input type="text"/><br>MORNING =1<br>EVENING=2<br>HOUR <input type="text"/> <input type="text"/><br>MINUTES <input type="text"/> <input type="text"/>                                         |
| 2A100                                                                      | Name of verbal autopsy respondent:<br>Surname _____<br>Name _____                                                                                                                                                                                       |
| 2A110                                                                      | What is your relationship to the deceased?<br>FATHER <input type="checkbox"/><br>MOTHER <input type="checkbox"/><br>SIBLING <input type="checkbox"/><br>OTHER RELATIVE _____ (SPECIFY) <input type="checkbox"/><br>NO RELATION <input type="checkbox"/> |
| 2A115                                                                      | Did you live with the deceased in the period leading to her/his death?<br>YES <input type="checkbox"/><br>NO <input type="checkbox"/>                                                                                                                   |
| <b>SECTION 2. INFORMATION ON THE DECEASED AND DATE/PLACE OF DEATH</b>      |                                                                                                                                                                                                                                                         |
| 1A100                                                                      | What was the name of the deceased?<br>Surname _____<br>Name _____                                                                                                                                                                                       |
| 1A110                                                                      | Was the deceased female or male?<br>MALE <input type="checkbox"/><br>FEMALE <input type="checkbox"/>                                                                                                                                                    |
| 1A200                                                                      | Is date of birth known?<br>YES <input type="checkbox"/><br>NO <input type="checkbox"/>                                                                                                                                                                  |
| 1A210                                                                      | + When was the deceased born?<br>DAY <input type="text"/> <input type="text"/><br>MONTH <input type="text"/> <input type="text"/><br>YEAR <input type="text"/> <input type="text"/> <input type="text"/> <input type="text"/>                           |
| 1A220                                                                      | Is date of death known?<br>YES <input type="checkbox"/><br>NO <input type="checkbox"/>                                                                                                                                                                  |
| 1A230                                                                      | + When did s/he die?<br>DAY <input type="text"/> <input type="text"/><br>MONTH <input type="text"/> <input type="text"/><br>YEAR <input type="text"/> <input type="text"/> <input type="text"/> <input type="text"/>                                    |
| 1A260                                                                      | How old was the deceased when s/he died?<br>DAYS <input type="text"/> <input type="text"/><br>HOURS <input type="text"/> <input type="text"/>                                                                                                           |
| 1A500                                                                      | What was her/his citizenship/nationality?<br>CITIZEN BY BIRTH <input type="checkbox"/><br>NATURALIZED CITIZ. <input type="checkbox"/><br>ALIEN <input type="checkbox"/><br>DON'T KNOW <input type="checkbox"/>                                          |

| NO.                                                    | QUESTIONS AND FILTERS                                                                                                                                                                                                           | CODING CATEGORIES                                                                                                                        |
|--------------------------------------------------------|---------------------------------------------------------------------------------------------------------------------------------------------------------------------------------------------------------------------------------|------------------------------------------------------------------------------------------------------------------------------------------|
| 1A510                                                  | What was her/his ethnicity?                                                                                                                                                                                                     | ETHNICITY A<br>ETHNICITY B<br>ETHNICITY C<br>OTHER (specify) _____                                                                       |
| 1A520                                                  | What was her/his place of birth?<br><br>1 Larger admin area (e.g., province) _____<br>2 Smaller admin area (e.g., county) _____<br>3 Locality (e.g., city, village) _____<br><br>4 Urban/Rural<br><br>5 Other country           | LARGER ADMIN AREA<br><br>SMALLER ADMIN AREA<br><br>LOCALITY<br><br>DON'T KNOW<br><br>URBAN<br>RURAL<br><br>OTHER COUNTRY (specify) _____ |
| 1A530                                                  | What was her/his place of usual residence?<br><br>1 Larger admin area (e.g., province) _____<br>2 Smaller admin area (e.g., county) _____<br>3 Locality (e.g., city, village) _____<br><br>4 Urban/Rural<br><br>5 Other country | LARGER ADMIN AREA<br><br>SMALLER ADMIN AREA<br><br>LOCALITY<br><br>DON'T KNOW<br><br>URBAN<br>RURAL<br><br>OTHER COUNTRY (specify) _____ |
| 1A550                                                  | Where did death occur?<br><br>1 Larger admin area (e.g., province) _____<br>2 Smaller admin area (e.g., county) _____<br>3 Locality (e.g., city, village) _____<br><br>4 Urban/Rural<br><br>5 Other country                     | LARGER ADMIN AREA<br><br>SMALLER ADMIN AREA<br><br>LOCALITY<br><br>DON'T KNOW<br><br>URBAN<br>RURAL<br><br>OTHER COUNTRY (specify) _____ |
| 1A560                                                  | What was the site of death?                                                                                                                                                                                                     | HOSPITAL<br>OTHER HEALTH FACILITY<br>HOME<br>OTHER (specify) _____<br>DON'T KNOW                                                         |
| 1A630                                                  | What was the name of the mother?<br><br>Surname _____<br>Name _____                                                                                                                                                             |                                                                                                                                          |
| 1A620                                                  | What was the name of the father?<br><br>Surname _____<br>Name _____                                                                                                                                                             |                                                                                                                                          |
| <b>SECTION 3. DEATH REGISTRATION AND CERTIFICATION</b> |                                                                                                                                                                                                                                 |                                                                                                                                          |
| 1A700                                                  | Death registration number                                                                                                                                                                                                       |                                                                                                                                          |
| 1A710                                                  | Date of registration<br><br>RECORD '98' IF DON'T KNOW DAY OR MONTH<br>RECORD '9998' IF DON'T KNOW YEAR                                                                                                                          | DAY<br><br>MONTH<br><br>YEAR                                                                                                             |

| NO.   | QUESTIONS AND FILTERS                                                                                                                                                                                                                                        | CODING CATEGORIES                                                                   |
|-------|--------------------------------------------------------------------------------------------------------------------------------------------------------------------------------------------------------------------------------------------------------------|-------------------------------------------------------------------------------------|
| 1A720 | Place where the death is registered:<br>1 Larger admin area (e.g., province) _____<br>2 Smaller admin area (e.g., county) _____<br>3 Locality (e.g., city, village) _____<br>4 Urban/Rural _____<br>5 Name of local registrar<br>Surname _____<br>Name _____ | LARGER ADMIN AREA<br>SMALLER ADMIN AREA<br>LOCALITY<br>URBAN<br>RURAL<br>DON'T KNOW |
| 1A730 | National identification number of deceased                                                                                                                                                                                                                   |                                                                                     |

| NO.                                                                       | QUESTIONS AND FILTERS                                                                                                  | CODING CATEGORIES |
|---------------------------------------------------------------------------|------------------------------------------------------------------------------------------------------------------------|-------------------|
| <b>SECTION 4. RESPONDENT'S ACCOUNT OF ILLNESS/EVENTS LEADING TO DEATH</b> |                                                                                                                        |                   |
|                                                                           | <p>Could you tell me about the illness/events that led to her his/death?</p> <hr/> <hr/> <hr/> <hr/> <hr/> <hr/> <hr/> |                   |
|                                                                           | <p>CAUSE OF DEATH 1 ACCORDING TO RESPONDENT</p> <hr/>                                                                  |                   |
|                                                                           | <p>CAUSE OF DEATH 2 ACCORDING TO RESPONDENT</p> <hr/>                                                                  |                   |

| DEATH OF A CHILD AGED UNDER 4 WEEKS (28 DAYS)            |                                                                                                                                                                                                                                                                                                                                                         |                                                                                                                 |
|----------------------------------------------------------|---------------------------------------------------------------------------------------------------------------------------------------------------------------------------------------------------------------------------------------------------------------------------------------------------------------------------------------------------------|-----------------------------------------------------------------------------------------------------------------|
| NO.                                                      | QUESTIONS AND FILTERS                                                                                                                                                                                                                                                                                                                                   | CODING CATEGORIES                                                                                               |
| <b>SECTION 4. PREGNANCY HISTORY</b>                      |                                                                                                                                                                                                                                                                                                                                                         |                                                                                                                 |
|                                                          | I would like to ask you some questions concerning the mother and symptoms that the deceased had/showed at birth and shortly after. Some of these questions may not appear to be directly related to the baby's death. Kindly be patient and answer all the questions. They will help us to get a clear picture of all possible symptoms that [NAME] had |                                                                                                                 |
| 3D500                                                    | How many births, including stillbirths, did the baby's mother have before this baby?                                                                                                                                                                                                                                                                    | NUMBER OF BIRTHS/<br>STILLBIRTHS<br>DONT KNOW <input type="text"/> <input type="text"/><br><input type="text"/> |
| 3D210                                                    | How many weeks was the pregnancy when the baby was born?                                                                                                                                                                                                                                                                                                | NUMBER OF WEEKS<br>DONT KNOW <input type="text"/> <input type="text"/><br><input type="text"/>                  |
| 3D510                                                    | During the pregnancy did the baby's mother suffer from high blood pressure?                                                                                                                                                                                                                                                                             | YES<br>NO<br>DONT KNOW <input type="text"/><br><input type="text"/>                                             |
| 3D550                                                    | Did the baby's mother have vaginal bleeding during the last 3 months of pregnancy but before labour started?                                                                                                                                                                                                                                            | YES<br>NO<br>DONT KNOW <input type="text"/><br><input type="text"/>                                             |
| 3D520                                                    | Did the baby's mother have foul smelling vaginal discharge during pregnancy and/or after delivery?                                                                                                                                                                                                                                                      | YES<br>NO<br>DONT KNOW <input type="text"/><br><input type="text"/>                                             |
| 3D540                                                    | During the last 3 months of pregnancy did the baby's mother suffer from blurred vision?                                                                                                                                                                                                                                                                 | YES<br>NO<br>DONT KNOW <input type="text"/><br><input type="text"/>                                             |
| 3D530                                                    | During the last 3 months of pregnancy did the baby's mother suffer from convulsions?                                                                                                                                                                                                                                                                    | YES<br>NO<br>DONT KNOW <input type="text"/><br><input type="text"/>                                             |
| 3D100                                                    | Was the child part of a multiple birth?                                                                                                                                                                                                                                                                                                                 | YES<br>NO<br>DONT KNOW <input type="text"/><br><input type="text"/>                                             |
| 3D110                                                    | Was the child born in a complicated delivery?                                                                                                                                                                                                                                                                                                           | YES<br>NO<br>DONT KNOW <input type="text"/><br><input type="text"/>                                             |
| <b>SECTION 5. DELIVERY HISTORY</b>                       |                                                                                                                                                                                                                                                                                                                                                         |                                                                                                                 |
| 3D560                                                    | Was the child born in a health facility?                                                                                                                                                                                                                                                                                                                | YES<br>NO<br>DONT KNOW <input type="text"/><br><input type="text"/>                                             |
| 3D570                                                    | Was the child born at home?                                                                                                                                                                                                                                                                                                                             | YES<br>NO<br>DONT KNOW <input type="text"/><br><input type="text"/>                                             |
| 3D580                                                    | Was the child born somewhere else (e.g. on the way to a health facility)?                                                                                                                                                                                                                                                                               | YES<br>NO<br>DONT KNOW <input type="text"/><br><input type="text"/>                                             |
| 3D590                                                    | Did the mother receive professional assistance during the delivery?                                                                                                                                                                                                                                                                                     | YES<br>NO<br>DONT KNOW <input type="text"/><br><input type="text"/>                                             |
| 3D120                                                    | Was the baby born 24 hours or more after the water broke?                                                                                                                                                                                                                                                                                               | YES<br>NO<br>DONT KNOW <input type="text"/><br><input type="text"/>                                             |
| 3D130                                                    | Did the baby stop moving in the womb before labour started?                                                                                                                                                                                                                                                                                             | YES<br>NO<br>DON'T KNOW <input type="text"/><br><input type="text"/>                                            |
| 3D140                                                    | Was baby born in a normal vaginal delivery?                                                                                                                                                                                                                                                                                                             | YES<br>NO<br>DON'T KNOW <input type="text"/><br><input type="text"/>                                            |
| 3D150                                                    | Was baby born with forceps/vacuum?                                                                                                                                                                                                                                                                                                                      | YES<br>NO<br>DON'T KNOW <input type="text"/><br><input type="text"/>                                            |
| 3D160                                                    | Was baby delivered by caesarean section?                                                                                                                                                                                                                                                                                                                | YES<br>NO<br>DON'T KNOW <input type="text"/><br><input type="text"/>                                            |
| 3D170                                                    | Did the baby's bottom, feet, arm or hand come into the vagina before its head?                                                                                                                                                                                                                                                                          | YES<br>NO<br>DONT KNOW <input type="text"/><br><input type="text"/>                                             |
| <b>SECTION 6. CONDITION OF THE BABY SOON AFTER BIRTH</b> |                                                                                                                                                                                                                                                                                                                                                         |                                                                                                                 |
| 3D180                                                    | Was the baby of abnormal size?                                                                                                                                                                                                                                                                                                                          | YES<br>NO<br>DONT KNOW <input type="text"/><br><input type="text"/>                                             |
| 3D190                                                    | + Was the baby smaller than normal, weighing under + 2.5 kg?                                                                                                                                                                                                                                                                                            | YES<br>NO<br>DONT KNOW <input type="text"/><br><input type="text"/>                                             |



| NO.                                             | QUESTIONS AND FILTERS                                                                                | CODING CATEGORIES      |                                                                                  |
|-------------------------------------------------|------------------------------------------------------------------------------------------------------|------------------------|----------------------------------------------------------------------------------|
| 3D200                                           | + Was the baby larger than normal, weighing over 4.5 kg?                                             | YES<br>NO<br>DONT KNOW | <input type="checkbox"/><br><input type="checkbox"/><br><input type="checkbox"/> |
| 3D220                                           | Was the umbilical cord wrapped several times (more than once) around the neck of the child at birth? | YES<br>NO<br>DONT KNOW | <input type="checkbox"/><br><input type="checkbox"/><br><input type="checkbox"/> |
| 3D230                                           | Did the baby have any noticeable malformation?                                                       | YES<br>NO<br>DONT KNOW | <input type="checkbox"/><br><input type="checkbox"/><br><input type="checkbox"/> |
| 3D240                                           | + Did the baby have a swelling/defect on the back?                                                   | YES<br>NO<br>DONT KNOW | <input type="checkbox"/><br><input type="checkbox"/><br><input type="checkbox"/> |
| 3D250                                           | + Did the baby have a very large head?                                                               | YES<br>NO<br>DONT KNOW | <input type="checkbox"/><br><input type="checkbox"/><br><input type="checkbox"/> |
| 3D260                                           | + Did the baby have a very small head?                                                               | YES<br>NO<br>DONT KNOW | <input type="checkbox"/><br><input type="checkbox"/><br><input type="checkbox"/> |
| 3D280                                           | Was the baby blue in colour at birth?                                                                | YES<br>NO<br>DONT KNOW | <input type="checkbox"/><br><input type="checkbox"/><br><input type="checkbox"/> |
| 3D300                                           | Did the baby breathe after birth, even a little?                                                     | YES<br>NO<br>DONT KNOW | <input type="checkbox"/><br><input type="checkbox"/><br><input type="checkbox"/> |
| 3D310                                           | Was the baby given assistance to breathe at birth?                                                   | YES<br>NO<br>DONT KNOW | <input type="checkbox"/><br><input type="checkbox"/><br><input type="checkbox"/> |
| 3D290                                           | Did the baby ever cry after birth, even if only a little bit?                                        | YES<br>NO<br>DONT KNOW | <input type="checkbox"/><br><input type="checkbox"/><br><input type="checkbox"/> |
| 3D320                                           | If the baby did not cry or breathe, was it born dead?                                                | YES<br>NO<br>DONT KNOW | <input type="checkbox"/><br><input type="checkbox"/><br><input type="checkbox"/> |
| 3D330                                           | + Was the dead baby macerated, that is, showed signs of decay?                                       | YES<br>NO<br>DONT KNOW | <input type="checkbox"/><br><input type="checkbox"/><br><input type="checkbox"/> |
| <b>SECTION 7. HISTORY OF INJURIES/ACCIDENTS</b> |                                                                                                      |                        |                                                                                  |
| 3E100                                           | Did the baby suffer from any injury or accident that led to her/his death?                           | YES<br>NO<br>DONT KNOW | <input type="checkbox"/><br><input type="checkbox"/><br><input type="checkbox"/> |
| 3E110                                           | + Did the baby suffer from a road traffic accident?                                                  | YES<br>NO<br>DONT KNOW | <input type="checkbox"/><br><input type="checkbox"/><br><input type="checkbox"/> |
| 3E120                                           | + + Was the baby injured as a pedestrian?                                                            | YES<br>NO<br>DONT KNOW | <input type="checkbox"/><br><input type="checkbox"/><br><input type="checkbox"/> |
| 3E130                                           | + + + Was the baby injured as an occupant of a car vehicle?                                          | YES<br>NO<br>DONT KNOW | <input type="checkbox"/><br><input type="checkbox"/><br><input type="checkbox"/> |
| 3E140                                           | + + + Was the baby injured as an occupant of a bus/heavy transport vehicle?                          | YES<br>NO<br>DONT KNOW | <input type="checkbox"/><br><input type="checkbox"/><br><input type="checkbox"/> |
| 3E150                                           | + + Was the baby injured as a passenger of a motorcycle?                                             | YES<br>NO<br>DONT KNOW | <input type="checkbox"/><br><input type="checkbox"/><br><input type="checkbox"/> |
| 3E170                                           | + + Do you know anything about the counter-part that was hit during the road traffic accident?       | YES<br>NO              | <input type="checkbox"/><br><input type="checkbox"/>                             |
| 3E200                                           | + + + Was it a pedestrian?                                                                           | YES<br>NO<br>DONT KNOW | <input type="checkbox"/><br><input type="checkbox"/><br><input type="checkbox"/> |
| 3E210                                           | + + + Was it a stationary object?                                                                    | YES<br>NO<br>DONT KNOW | <input type="checkbox"/><br><input type="checkbox"/><br><input type="checkbox"/> |
| 3E220                                           | + + + Was it a car vehicle?                                                                          | YES<br>NO<br>DONT KNOW | <input type="checkbox"/><br><input type="checkbox"/><br><input type="checkbox"/> |
| 3E230                                           | + + + Was it a bus or heavy transport vehicle?                                                       | YES<br>NO<br>DONT KNOW | <input type="checkbox"/><br><input type="checkbox"/><br><input type="checkbox"/> |

| NO.                                        | QUESTIONS AND FILTERS                                                                             | CODING CATEGORIES                              |                                                                                                                                                             |
|--------------------------------------------|---------------------------------------------------------------------------------------------------|------------------------------------------------|-------------------------------------------------------------------------------------------------------------------------------------------------------------|
| 3E240                                      | + + + Was it a motor cycle?                                                                       | YES<br>NO<br>DONT KNOW                         | <input type="checkbox"/><br><input type="checkbox"/><br><input type="checkbox"/>                                                                            |
| 3E250                                      | + + + Was it a pedal cycle?                                                                       | YES<br>NO<br>DONT KNOW                         | <input type="checkbox"/><br><input type="checkbox"/><br><input type="checkbox"/>                                                                            |
| 3E260                                      | + + + Was it something else?                                                                      | YES (specify) _____<br>NO<br>DONT KNOW         | <input type="checkbox"/><br><input type="checkbox"/><br><input type="checkbox"/>                                                                            |
| 3E300                                      | + Was the baby injured in a non-road transport accident?                                          | YES<br>NO<br>DONT KNOW                         | <input type="checkbox"/><br><input type="checkbox"/><br><input type="checkbox"/>                                                                            |
| 3E310                                      | + + Was the baby injured in a fall?                                                               | YES<br>NO<br>DONT KNOW                         | <input type="checkbox"/><br><input type="checkbox"/><br><input type="checkbox"/>                                                                            |
| 3E320                                      | + + Did the baby die of drowning?                                                                 | YES<br>NO<br>DONT KNOW                         | <input type="checkbox"/><br><input type="checkbox"/><br><input type="checkbox"/>                                                                            |
| 3E330                                      | + + Did the baby suffer from burns?                                                               | YES<br>NO<br>DONT KNOW                         | <input type="checkbox"/><br><input type="checkbox"/><br><input type="checkbox"/>                                                                            |
| 3E340                                      | + + Did (s)he suffer from any plant/animal/insect bite or sting that led<br>+ + to her/his death? | YES<br>NO<br>DONT KNOW                         | <input type="checkbox"/><br><input type="checkbox"/><br><input type="checkbox"/>                                                                            |
| 3E400                                      | + + + Was it a dog?                                                                               | YES<br>NO<br>DONT KNOW                         | <input type="checkbox"/><br><input type="checkbox"/><br><input type="checkbox"/>                                                                            |
| 3E410                                      | + + + Was it a snake?                                                                             | YES<br>NO<br>DONT KNOW                         | <input type="checkbox"/><br><input type="checkbox"/><br><input type="checkbox"/>                                                                            |
| 3E420                                      | + + + Was it an insect?                                                                           | YES<br>NO<br>DONT KNOW                         | <input type="checkbox"/><br><input type="checkbox"/><br><input type="checkbox"/>                                                                            |
| 3E500                                      | + + Was the baby injured by a force of nature?                                                    | YES<br>NO<br>DONT KNOW                         | <input type="checkbox"/><br><input type="checkbox"/><br><input type="checkbox"/>                                                                            |
| 3E510                                      | + + Was there any poisoning?                                                                      | YES<br>NO<br>DONT KNOW                         | <input type="checkbox"/><br><input type="checkbox"/><br><input type="checkbox"/>                                                                            |
| 3E520                                      | + Was the baby subject to violence or assault?                                                    | YES<br>NO<br>DONT KNOW                         | <input type="checkbox"/><br><input type="checkbox"/><br><input type="checkbox"/>                                                                            |
| 3E530                                      | + Was the injury or accident intentionally inflicted by someone else?                             | YES<br>NO<br>DONT KNOW                         | <input type="checkbox"/><br><input type="checkbox"/><br><input type="checkbox"/>                                                                            |
| 3E600                                      | + + Was the baby injured by a fire arm?                                                           | YES<br>NO<br>DONT KNOW                         | <input type="checkbox"/><br><input type="checkbox"/><br><input type="checkbox"/>                                                                            |
| 3E610                                      | + + Was the baby injured from a stab, cut or pierce?                                              | YES<br>NO<br>DONT KNOW                         | <input type="checkbox"/><br><input type="checkbox"/><br><input type="checkbox"/>                                                                            |
| 3E620                                      | + + Was the baby injured by machinery?                                                            | YES<br>NO<br>DONT KNOW                         | <input type="checkbox"/><br><input type="checkbox"/><br><input type="checkbox"/>                                                                            |
| 3E630                                      | + + Was the baby struck by an animal or object?                                                   | YES<br>NO<br>DONT KNOW                         | <input type="checkbox"/><br><input type="checkbox"/><br><input type="checkbox"/>                                                                            |
| <b>SECTION 8. NEONATAL ILLNESS HISTORY</b> |                                                                                                   |                                                |                                                                                                                                                             |
| 3A280                                      | Did the baby die during the wet season?                                                           | YES<br>NO<br>DONT KNOW                         | <input type="checkbox"/><br><input type="checkbox"/><br><input type="checkbox"/>                                                                            |
| 3A290                                      | Did the baby die during the dry season?                                                           | YES<br>NO<br>DONT KNOW                         | <input type="checkbox"/><br><input type="checkbox"/><br><input type="checkbox"/>                                                                            |
| 3A300                                      | For how long was the baby ill before s/he died?                                                   | NUMBER OF HOURS<br>NUMBER OF DAYS<br>DONT KNOW | <input type="checkbox"/> <input type="checkbox"/><br><input type="checkbox"/> <input type="checkbox"/><br><input type="checkbox"/> <input type="checkbox"/> |

| NO.   | QUESTIONS AND FILTERS                                                                                | CODING CATEGORIES      |                                                                                  |
|-------|------------------------------------------------------------------------------------------------------|------------------------|----------------------------------------------------------------------------------|
| 3A310 | Did the baby die suddenly?                                                                           | YES<br>NO<br>DONT KNOW | <input type="checkbox"/><br><input type="checkbox"/><br><input type="checkbox"/> |
| 3D340 | Was the baby able to suckle or bottle-feed within first 24 hours after birth?                        | YES<br>NO<br>DONT KNOW | <input type="checkbox"/><br><input type="checkbox"/><br><input type="checkbox"/> |
| 3D350 | + Did the baby stop suckling of bottle feeding 3 days after birth?                                   | YES<br>NO<br>DONT KNOW | <input type="checkbox"/><br><input type="checkbox"/><br><input type="checkbox"/> |
| 3B460 | Did the baby have convulsions?                                                                       | YES<br>NO<br>DONT KNOW | <input type="checkbox"/><br><input type="checkbox"/><br><input type="checkbox"/> |
| 3D360 | + Did the baby have convulsions starting within the first day of life?                               | YES<br>NO<br>DONT KNOW | <input type="checkbox"/><br><input type="checkbox"/><br><input type="checkbox"/> |
| 3S370 | + Did the baby have convulsions starting on the second day or<br>+ later after birth?                | YES<br>NO<br>DONT KNOW | <input type="checkbox"/><br><input type="checkbox"/><br><input type="checkbox"/> |
| 3D380 | Did the baby's body become stiff, with the back arched backwards?                                    | YES<br>NO<br>DONT KNOW | <input type="checkbox"/><br><input type="checkbox"/><br><input type="checkbox"/> |
| 3D390 | Did the child have bulging or raised fontanelle?                                                     | YES<br>NO<br>DONT KNOW | <input type="checkbox"/><br><input type="checkbox"/><br><input type="checkbox"/> |
| 3D400 | Did the child have a sunken fontanelle?                                                              | YES<br>NO<br>DONT KNOW | <input type="checkbox"/><br><input type="checkbox"/><br><input type="checkbox"/> |
| 3D410 | + Did the baby become unresponsive or unconscious soon<br>+ after birth (within less than 24 hours)? | YES<br>NO<br>DONT KNOW | <input type="checkbox"/><br><input type="checkbox"/><br><input type="checkbox"/> |
| 3D420 | + Did the baby become unresponsive or unconscious more<br>+ than 1 day after birth?                  | YES<br>NO<br>DONT KNOW | <input type="checkbox"/><br><input type="checkbox"/><br><input type="checkbox"/> |
| 3B100 | Did the baby have a fever?                                                                           | YES<br>NO<br>DONT KNOW | <input type="checkbox"/><br><input type="checkbox"/><br><input type="checkbox"/> |
| 3D430 | Did the baby become cold to the touch before it died?                                                | YES<br>NO<br>DONT KNOW | <input type="checkbox"/><br><input type="checkbox"/><br><input type="checkbox"/> |
| 3B130 | Did the baby have a cough?                                                                           | YES<br>NO<br>DONT KNOW | <input type="checkbox"/><br><input type="checkbox"/><br><input type="checkbox"/> |
| 3B170 | + Did the baby make a whooping sound when coughing?<br>DEMONSTRATE                                   | YES<br>NO<br>DONT KNOW | <input type="checkbox"/><br><input type="checkbox"/><br><input type="checkbox"/> |
| 3B180 | Did the baby have any breathing problem?                                                             | YES<br>NO<br>DONT KNOW | <input type="checkbox"/><br><input type="checkbox"/><br><input type="checkbox"/> |
| 3B190 | + Did the baby have fast breathing?                                                                  | YES<br>NO<br>DONT KNOW | <input type="checkbox"/><br><input type="checkbox"/><br><input type="checkbox"/> |
| 3B210 | + Did the baby have breathlessness?                                                                  | YES<br>NO<br>DONT KNOW | <input type="checkbox"/><br><input type="checkbox"/><br><input type="checkbox"/> |
| 3B250 | + Did you see the lower chest wall/ribs being pulled in as the child<br>+ breathed?                  | YES<br>NO<br>DONT KNOW | <input type="checkbox"/><br><input type="checkbox"/><br><input type="checkbox"/> |
| 3B260 | + Did the baby have noisy breathing (grunting or wheezing)?<br>+ DEMONSTRATE                         | YES<br>NO<br>DONT KNOW | <input type="checkbox"/><br><input type="checkbox"/><br><input type="checkbox"/> |
| 3B280 | Did the baby have diarrhoea?                                                                         | YES<br>NO<br>DONT KNOW | <input type="checkbox"/><br><input type="checkbox"/><br><input type="checkbox"/> |
| 3B300 | + At any time during the final illness was there blood in the stools?                                | YES<br>NO<br>DONT KNOW | <input type="checkbox"/><br><input type="checkbox"/><br><input type="checkbox"/> |
| 3B310 | Did the baby vomit?                                                                                  | YES<br>NO<br>DONT KNOW | <input type="checkbox"/><br><input type="checkbox"/><br><input type="checkbox"/> |
| 3B320 | + Did the baby vomit "coffee grounds" or bright red/blood?                                           | YES<br>NO<br>DONT KNOW | <input type="checkbox"/><br><input type="checkbox"/><br><input type="checkbox"/> |

| NO.   | QUESTIONS AND FILTERS                                                           | CODING CATEGORIES      |                                                                                  |
|-------|---------------------------------------------------------------------------------|------------------------|----------------------------------------------------------------------------------|
| 3B360 | + Did the baby have a more than usual protruding abdomen?                       | YES<br>NO<br>DONT KNOW | <input type="checkbox"/><br><input type="checkbox"/><br><input type="checkbox"/> |
| 3D440 | Did the baby have redness or discharge from the umbilical cord stump?           | YES<br>NO<br>DONT KNOW | <input type="checkbox"/><br><input type="checkbox"/><br><input type="checkbox"/> |
| 3B530 | Did the baby have any skin problems?                                            | YES<br>NO<br>DONT KNOW | <input type="checkbox"/><br><input type="checkbox"/><br><input type="checkbox"/> |
| 3B540 | + Did the baby have any ulcers, abscess or sores<br>+ anywhere except the feet? | YES<br>NO<br>DONT KNOW | <input type="checkbox"/><br><input type="checkbox"/><br><input type="checkbox"/> |
| 3B550 | + Did the baby have any ulcers, abscess or sores on the feet?                   | YES<br>NO<br>DONT KNOW | <input type="checkbox"/><br><input type="checkbox"/><br><input type="checkbox"/> |
| 3B560 | + During the illness that led to death, did the baby have<br>+ any skin rash?   | YES<br>NO<br>DONT KNOW | <input type="checkbox"/><br><input type="checkbox"/><br><input type="checkbox"/> |
| 3B580 | + + Did the baby have measles rash?                                             | YES<br>NO<br>DONT KNOW | <input type="checkbox"/><br><input type="checkbox"/><br><input type="checkbox"/> |
| 3D450 | Did the baby have yellow palms or soles?                                        | YES<br>NO<br>DONT KNOW | <input type="checkbox"/><br><input type="checkbox"/><br><input type="checkbox"/> |
| 3D460 | Did the mother receive tetanus toxoid (TT) vaccine?                             | YES<br>NO<br>DONT KNOW | <input type="checkbox"/><br><input type="checkbox"/><br><input type="checkbox"/> |

| DEATH OF A CHILD AGED UNDER 4 WEEKS (28 DAYS)                           |                                                                                                                                                                                    |                         |                                                                                  |
|-------------------------------------------------------------------------|------------------------------------------------------------------------------------------------------------------------------------------------------------------------------------|-------------------------|----------------------------------------------------------------------------------|
| NO.                                                                     | QUESTIONS AND FILTERS                                                                                                                                                              | CODING CATEGORIES       |                                                                                  |
| <b>SECTION 9 TREATMENT AND HEALTH SERVICE USE FOR THE FINAL ILLNESS</b> |                                                                                                                                                                                    |                         |                                                                                  |
| 3G100                                                                   | Was s/he adequately vaccinated?                                                                                                                                                    | YES<br>NO<br>DON'T KNOW | <input type="checkbox"/><br><input type="checkbox"/><br><input type="checkbox"/> |
| 3G110                                                                   | Did s/he receive any treatment for the illness that led to death?                                                                                                                  | YES<br>NO<br>DON'T KNOW | <input type="checkbox"/><br><input type="checkbox"/><br><input type="checkbox"/> |
| 3G120                                                                   | + Did s/he receive oral rehydration salts?                                                                                                                                         | YES<br>NO<br>DON'T KNOW | <input type="checkbox"/><br><input type="checkbox"/><br><input type="checkbox"/> |
| 3G130                                                                   | + Did s/he receive (or needed) intravenous fluids (drip) treatment?                                                                                                                | YES<br>NO<br>DON'T KNOW | <input type="checkbox"/><br><input type="checkbox"/><br><input type="checkbox"/> |
| 3G140                                                                   | + Did s/he receive (or needed) a blood transfusion?                                                                                                                                | YES<br>NO<br>DON'T KNOW | <input type="checkbox"/><br><input type="checkbox"/><br><input type="checkbox"/> |
| 3G150                                                                   | + Did s/he receive (or needed) treatment/food through a tube passed<br>+ through the nose?                                                                                         | YES<br>NO<br>DON'T KNOW | <input type="checkbox"/><br><input type="checkbox"/><br><input type="checkbox"/> |
| 3G160                                                                   | + Did s/he receive (or needed) injectable (IV or IM) antibiotics?                                                                                                                  | YES<br>NO<br>DON'T KNOW | <input type="checkbox"/><br><input type="checkbox"/><br><input type="checkbox"/> |
| 3G170                                                                   | + Did s/he have (or needed) an operation for the illness?                                                                                                                          | YES<br>NO<br>DON'T KNOW | <input type="checkbox"/><br><input type="checkbox"/><br><input type="checkbox"/> |
| 3G190                                                                   | + Was s/he discharged from the hospital very ill?                                                                                                                                  | YES<br>NO<br>DON'T KNOW | <input type="checkbox"/><br><input type="checkbox"/><br><input type="checkbox"/> |
| <b>SECTION 10. BACKGROUND</b>                                           |                                                                                                                                                                                    |                         |                                                                                  |
| 4A100                                                                   | In the final days, did the baby travel to a hospital or health facility?                                                                                                           | YES<br>NO<br>DON'T KNOW | <input type="checkbox"/><br><input type="checkbox"/><br><input type="checkbox"/> |
| 4A110                                                                   | + Did s/he use motorised transport to get to the hospital or<br>+ health facility?                                                                                                 | YES<br>NO<br>DON'T KNOW | <input type="checkbox"/><br><input type="checkbox"/><br><input type="checkbox"/> |
| 4A120                                                                   | + Were there any problems during admission to the hospital or<br>+ health facility?                                                                                                | YES<br>NO<br>DON'T KNOW | <input type="checkbox"/><br><input type="checkbox"/><br><input type="checkbox"/> |
| 4A130                                                                   | + Were there any problems with the way (s)he was treated (medical treatment,<br>+ procedures, inter-personal attitudes, respect, dignity) in the<br>+ hospital or health facility? | YES<br>NO<br>DON'T KNOW | <input type="checkbox"/><br><input type="checkbox"/><br><input type="checkbox"/> |
| 4A140                                                                   | + Were there any problems getting medications, or diagnostic tests<br>+ in the hospital or health facility?                                                                        | YES<br>NO<br>DON'T KNOW | <input type="checkbox"/><br><input type="checkbox"/><br><input type="checkbox"/> |
| 4A150                                                                   | Does it take more than 2 hours to get to the nearest hospital or<br>health facility from the deceased's household?                                                                 | YES<br>NO<br>DON'T KNOW | <input type="checkbox"/><br><input type="checkbox"/><br><input type="checkbox"/> |
| 4A160                                                                   | In the final days before death, were there any doubts about whether<br>medical care was needed?                                                                                    | YES<br>NO<br>DON'T KNOW | <input type="checkbox"/><br><input type="checkbox"/><br><input type="checkbox"/> |
| 4A170                                                                   | In the final days before death, was traditional medicine used?                                                                                                                     | YES<br>NO<br>DON'T KNOW | <input type="checkbox"/><br><input type="checkbox"/><br><input type="checkbox"/> |
| 4A180                                                                   | In the final days before death, did anyone use a telephone or cell phone<br>to call for help?                                                                                      | YES<br>NO<br>DON'T KNOW | <input type="checkbox"/><br><input type="checkbox"/><br><input type="checkbox"/> |
| 4A190                                                                   | Over the course of illness, did the total costs of care and treatment<br>prohibit other household payments?                                                                        | YES<br>NO<br>DON'T KNOW | <input type="checkbox"/><br><input type="checkbox"/><br><input type="checkbox"/> |

|                                           |                                            |  |
|-------------------------------------------|--------------------------------------------|--|
| 5A100                                     | <u>INTERVIEWER'S OBSERVATIONS</u>          |  |
|                                           | TO BE FILLED IN AFTER COMPLETING INTERVIEW |  |
|                                           |                                            |  |
|                                           |                                            |  |
|                                           |                                            |  |
|                                           |                                            |  |
|                                           |                                            |  |
|                                           |                                            |  |
|                                           |                                            |  |
|                                           |                                            |  |
| COMMENTS ON SPECIFIC QUESTIONS:           |                                            |  |
|                                           |                                            |  |
|                                           |                                            |  |
|                                           |                                            |  |
|                                           |                                            |  |
| ANY OTHER COMMENTS:                       |                                            |  |
|                                           |                                            |  |
|                                           |                                            |  |
|                                           |                                            |  |
|                                           |                                            |  |
| <u>SUPERVISOR'S OBSERVATIONS</u>          |                                            |  |
|                                           |                                            |  |
|                                           |                                            |  |
|                                           |                                            |  |
|                                           |                                            |  |
|                                           |                                            |  |
|                                           |                                            |  |
|                                           |                                            |  |
|                                           |                                            |  |
|                                           |                                            |  |
| NAME OF THE SUPERVISOR: _____ DATE: _____ |                                            |  |

# **2012 WHO VERBAL AUTOPSY SAMPLE QUESTIONNAIRE 2**

*Death of a child aged 4 weeks to 14 years*

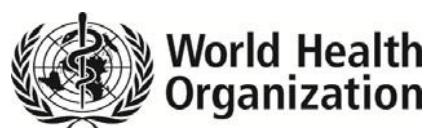

| 2012 WHO VERBAL AUTOPSY [FORM 2]<br>DEATH OF A CHILD AGED 4 WEEKS (29 DAYS) TO 14 YEARS |                                                                                                             |                                                                                                                                                                                                                                                 |
|-----------------------------------------------------------------------------------------|-------------------------------------------------------------------------------------------------------------|-------------------------------------------------------------------------------------------------------------------------------------------------------------------------------------------------------------------------------------------------|
| NO.                                                                                     | QUESTIONS AND FILTERS                                                                                       | CODING CATEGORIES                                                                                                                                                                                                                               |
| <b>SECTION 1. BASIC INFORMATION ABOUT THE INTERVIEW AND THE RESPONDENT</b>              |                                                                                                             |                                                                                                                                                                                                                                                 |
| 2A120                                                                                   | Name of verbal autopsy interviewer:<br><br>Surname _____<br><br>Name _____                                  |                                                                                                                                                                                                                                                 |
| 2A140                                                                                   | RECORD THE DATE OF INTERVIEW                                                                                | DAY <input type="text"/> <input type="text"/><br><br>MONTH <input type="text"/> <input type="text"/><br><br>YEAR <input type="text"/> <input type="text"/> <input type="text"/> <input type="text"/>                                            |
| 2A130                                                                                   | RECORD THE TIME AT START OF INTERVIEW<br><br>MORNING =1<br>EVENING=2                                        | MORNING/EVENING <input type="text"/><br><br>HOUR <input type="text"/> <input type="text"/><br><br>MINUTES <input type="text"/> <input type="text"/>                                                                                             |
| 2A100                                                                                   | Name of verbal autopsy respondent<br><br>Surname _____<br><br>Name _____                                    |                                                                                                                                                                                                                                                 |
| 2A110                                                                                   | What is your relationship to the deceased?                                                                  | FATHER <input type="checkbox"/><br>MOTHER <input type="checkbox"/><br>SPOUSE <input type="checkbox"/><br>SIBLING <input type="checkbox"/><br>OTHER RELATIVE _____ <input type="checkbox"/><br>(SPECIFY)<br>NO RELATION <input type="checkbox"/> |
| 2A115                                                                                   | Did you live with the deceased in the period leading to her/his death?                                      | YES <input type="checkbox"/><br>NO <input type="checkbox"/>                                                                                                                                                                                     |
| <b>SECTION 2. INFORMATION ON THE DECEASED AND DATE/PLACE OF DEATH</b>                   |                                                                                                             |                                                                                                                                                                                                                                                 |
| 1A100                                                                                   | What was the name of the deceased?<br><br>Surname _____<br><br>Name _____                                   |                                                                                                                                                                                                                                                 |
| 1A110                                                                                   | Was the deceased female or male?                                                                            | FEMALE <input type="checkbox"/><br>MALE <input type="checkbox"/>                                                                                                                                                                                |
| 1A200                                                                                   | Is date of birth known?                                                                                     | YES <input type="checkbox"/><br>NO <input type="checkbox"/>                                                                                                                                                                                     |
| 1A210                                                                                   | + When was the deceased born?                                                                               | DAY <input type="text"/> <input type="text"/><br><br>MONTH <input type="text"/> <input type="text"/><br><br>YEAR <input type="text"/> <input type="text"/> <input type="text"/> <input type="text"/>                                            |
| 1A220                                                                                   | Is date of death known?                                                                                     | YES <input type="checkbox"/><br>NO <input type="checkbox"/>                                                                                                                                                                                     |
| 1A230                                                                                   | + When did s/he die?                                                                                        | DAY <input type="text"/> <input type="text"/><br><br>MONTH <input type="text"/> <input type="text"/><br><br>YEAR <input type="text"/> <input type="text"/> <input type="text"/> <input type="text"/>                                            |
| 1A240<br>1A250                                                                          | How old was the deceased when s/he died?<br><br>IF AGE IS LESS THAN 1 YEAR RECORD IN MONTHS                 | AGE IN YEARS <input type="text"/> <input type="text"/><br><br>AGE IN MONTHS <input type="text"/> <input type="text"/>                                                                                                                           |
| 1A400                                                                                   | Was this a woman who died more than 42 days but less than 1 year after being pregnant or delivering a baby? | YES <input type="checkbox"/><br>NO <input type="checkbox"/><br>DON'T KNOW <input type="checkbox"/>                                                                                                                                              |



| NO.   | QUESTIONS AND FILTERS                                                                                                                                                                                                                          | CODING CATEGORIES                                                                                                    |
|-------|------------------------------------------------------------------------------------------------------------------------------------------------------------------------------------------------------------------------------------------------|----------------------------------------------------------------------------------------------------------------------|
| 1A500 | What was her/his citizenship/nationality?                                                                                                                                                                                                      | CITIZEN BY BIRTH<br>NATURALIZED CITIZ.<br>ALIEN<br>DON'T KNOW                                                        |
| 1A510 | What was her/his ethnicity?                                                                                                                                                                                                                    | ETHNICITY A<br>ETHNICITY B<br>ETHNICITY C<br>OTHER (specify) _____                                                   |
| 1A520 | What was her/his place of birth?<br>1 Larger admin area (e.g., province) _____<br>2 Smaller admin area (e.g., county) _____<br>3 Locality (e.g., city, village) _____<br>4 Urban/Rural<br>5 Other country                                      | LARGER ADMIN AREA<br>SMALLER ADMIN AREA<br>LOCALITY<br>DON'T KNOW<br>URBAN<br>RURAL<br>OTHER COUNTRY (specify) _____ |
| 1A530 | What was her/his place of usual residence?<br>1 Larger admin area (e.g., province) _____<br>2 Smaller admin area (e.g., county) _____<br>3 Locality (e.g., city, village) _____<br>4 Urban/Rural<br>5 Other country                            | LARGER ADMIN AREA<br>SMALLER ADMIN AREA<br>LOCALITY<br>DON'T KNOW<br>URBAN<br>RURAL<br>OTHER COUNTRY (specify) _____ |
| 1A540 | What was her/his place of normal residence 1 to 5 years before death?<br>1 Larger admin area (e.g., province) _____<br>2 Smaller admin area (e.g., county) _____<br>3 Locality (e.g., city, village) _____<br>4 Urban/Rural<br>5 Other country | LARGER ADMIN AREA<br>SMALLER ADMIN AREA<br>LOCALITY<br>DON'T KNOW<br>URBAN<br>RURAL<br>OTHER COUNTRY (specify) _____ |
| 1A550 | Where did death occur?<br>1 Larger admin area (e.g., province) _____<br>2 Smaller admin area (e.g., county) _____<br>3 Locality (e.g., city, village) _____<br>4 Urban/Rural<br>5 Other country                                                | LARGER ADMIN AREA<br>SMALLER ADMIN AREA<br>LOCALITY<br>DON'T KNOW<br>URBAN<br>RURAL<br>OTHER COUNTRY (specify) _____ |
| 1A560 | What was the site of death?                                                                                                                                                                                                                    | HOSPITAL<br>OTHER HEALTH FACILITY<br>HOME<br>OTHER (specify) _____<br>DON'T KNOW                                     |
| 1A600 | What was her/his marital status?                                                                                                                                                                                                               | NEVER MARRIED<br>MARRIED/LIVING WITH A PARTNER<br>WIDOWED<br>DIVORCED<br>SEPARATED<br>DON'T KNOW                     |
| 1A610 | What was the date of marriage?<br>RECORD '98' IF DON'T KNOW DAY OR MONTH<br>RECORD '9998' IF DON'T KNOW YEAR                                                                                                                                   | DAY<br>MONTH<br>YEAR                                                                                                 |

| NO.                                                    | QUESTIONS AND FILTERS                                                                                                                                                                                                                                        | CODING CATEGORIES                                                                                                                                                                                                                                                                                                                                                                                          |
|--------------------------------------------------------|--------------------------------------------------------------------------------------------------------------------------------------------------------------------------------------------------------------------------------------------------------------|------------------------------------------------------------------------------------------------------------------------------------------------------------------------------------------------------------------------------------------------------------------------------------------------------------------------------------------------------------------------------------------------------------|
| 1A630                                                  | What was the name of the mother?<br>Surname _____<br>Name _____                                                                                                                                                                                              |                                                                                                                                                                                                                                                                                                                                                                                                            |
| 1A620                                                  | What was the name of the father?<br>Surname _____<br>Name _____                                                                                                                                                                                              |                                                                                                                                                                                                                                                                                                                                                                                                            |
| 1A640                                                  | What was her/his highest level of schooling?                                                                                                                                                                                                                 | NO FORMAL EDUCATION <input type="checkbox"/><br>PRIMARY <input type="checkbox"/><br>SECONDARY <input type="checkbox"/><br>HIGHER <input type="checkbox"/><br>DON'T KNOW <input type="checkbox"/>                                                                                                                                                                                                           |
| 1A650                                                  | Was s/he able to read and write?                                                                                                                                                                                                                             | YES <input type="checkbox"/><br>NO <input type="checkbox"/><br>DON'T KNOW <input type="checkbox"/>                                                                                                                                                                                                                                                                                                         |
| 1A660                                                  | What was her/his economical activity status in year prior to death?                                                                                                                                                                                          | USUALLY ECONOMICALLY ACTIVE <input type="checkbox"/><br>MAINLY EMPLOYED <input type="checkbox"/><br>MAINLY UNEMPLOYED <input type="checkbox"/><br>NOT ECONOMICALLY ACTIVE <input type="checkbox"/><br>HOME-MAKER <input type="checkbox"/><br>STUDENT <input type="checkbox"/><br>PENSION <input type="checkbox"/><br>OTHER (specify) _____ <input type="checkbox"/><br>DON'T KNOW <input type="checkbox"/> |
| 1A670                                                  | What was her/his occupation, that is, what kind of work did s/he mainly do?                                                                                                                                                                                  | _____<br>_____<br>_____                                                                                                                                                                                                                                                                                                                                                                                    |
| <b>SECTION 3. DEATH REGISTRATION AND CERTIFICATION</b> |                                                                                                                                                                                                                                                              |                                                                                                                                                                                                                                                                                                                                                                                                            |
| 1A700                                                  | Death registration number                                                                                                                                                                                                                                    | <input type="text"/>                                                                                                                                                                                                                                                                                                                                                                                       |
| 1A710                                                  | Date of registration<br><br>RECORD '98' IF DON'T KNOW DAY OR MONTH<br>RECORD '9998' IF DON'T KNOW YEAR                                                                                                                                                       | DAY <input type="text"/><br>MONTH <input type="text"/><br>YEAR <input type="text"/>                                                                                                                                                                                                                                                                                                                        |
| 1A720                                                  | Place where the death is registered:<br>1 Larger admin area (e.g., province) _____<br>2 Smaller admin area (e.g., county) _____<br>3 Locality (e.g., city, village) _____<br>4 Urban/Rural _____<br>5 Name of local registrar<br>Surname _____<br>Name _____ | LARGER ADMIN AREA <input type="text"/><br>SMALLER ADMIN AREA <input type="text"/><br>LOCALITY <input type="text"/><br>URBAN <input type="text"/><br>RURAL <input type="text"/><br>DON'T KNOW <input type="text"/>                                                                                                                                                                                          |
| 1A730                                                  | National identification number of deceased                                                                                                                                                                                                                   | <input type="text"/>                                                                                                                                                                                                                                                                                                                                                                                       |

2012 WHO VERBAL AUTOPSY [FORM 2]  
DEATH OF A CHILD AGED 4 WEEKS TO 14 YEARS

| NO.                                                                          | QUESTIONS AND FILTERS                                                                                                                                                                                                                                                                                                                                                                                                                                                                | CODING CATEGORIES                                                                                                                               |
|------------------------------------------------------------------------------|--------------------------------------------------------------------------------------------------------------------------------------------------------------------------------------------------------------------------------------------------------------------------------------------------------------------------------------------------------------------------------------------------------------------------------------------------------------------------------------|-------------------------------------------------------------------------------------------------------------------------------------------------|
| <b>SECTION 4. RESPONDENT'S ACCOUNT OF ILLNESS/EVENTS LEADING TO DEATH</b>    |                                                                                                                                                                                                                                                                                                                                                                                                                                                                                      |                                                                                                                                                 |
|                                                                              | <p>Could you tell me about the illness/events that led to her his/death?</p> <p>_____</p> <p>_____</p> <p>_____</p> <p>_____</p> <p>_____</p>                                                                                                                                                                                                                                                                                                                                        |                                                                                                                                                 |
|                                                                              | CAUSE OF DEATH 1 ACCORDING TO RESPONDENT                                                                                                                                                                                                                                                                                                                                                                                                                                             |                                                                                                                                                 |
|                                                                              | CAUSE OF DEATH 2 ACCORDING TO RESPONDENT                                                                                                                                                                                                                                                                                                                                                                                                                                             |                                                                                                                                                 |
| <b>SECTION 5. CONTEXT AND HISTORY OF PREVIOUSLY KNOWN MEDICAL CONDITIONS</b> |                                                                                                                                                                                                                                                                                                                                                                                                                                                                                      |                                                                                                                                                 |
|                                                                              | <p>I would like to ask you some questions concerning the contexts and previously known medical conditions the deceased had; injuries and accidents that the deceased suffered; and signs and symptoms that the deceased had/showed when s/he was ill. Some of these questions may not appear to be directly related to his/her death. Please bear with me and answer all the questions. They will help us to get a clear picture of all possible symptoms that the deceased had.</p> |                                                                                                                                                 |
| 3A100                                                                        | Was there any diagnosis of Tuberculosis?                                                                                                                                                                                                                                                                                                                                                                                                                                             | YES<br>NO<br>DON'T KNOW <div style="float: right;"> <input type="checkbox"/><br/> <input type="checkbox"/><br/> <input type="checkbox"/> </div> |
| 3A110                                                                        | Was there any diagnosis of HIV/AIDS?                                                                                                                                                                                                                                                                                                                                                                                                                                                 | YES<br>NO<br>DON'T KNOW <div style="float: right;"> <input type="checkbox"/><br/> <input type="checkbox"/><br/> <input type="checkbox"/> </div> |
| 3A120                                                                        | Did s/he have a recent positive test for Malaria?                                                                                                                                                                                                                                                                                                                                                                                                                                    | YES<br>NO<br>DON'T KNOW <div style="float: right;"> <input type="checkbox"/><br/> <input type="checkbox"/><br/> <input type="checkbox"/> </div> |
| 3A130                                                                        | Did s/he have a recent negative test for Malaria?                                                                                                                                                                                                                                                                                                                                                                                                                                    | YES<br>NO<br>DON'T KNOW <div style="float: right;"> <input type="checkbox"/><br/> <input type="checkbox"/><br/> <input type="checkbox"/> </div> |
| 3A140                                                                        | Was there any diagnosis of Measles?                                                                                                                                                                                                                                                                                                                                                                                                                                                  | YES<br>NO<br>DON'T KNOW <div style="float: right;"> <input type="checkbox"/><br/> <input type="checkbox"/><br/> <input type="checkbox"/> </div> |
| 3A150                                                                        | Was there any diagnosis of High Blood Pressure?                                                                                                                                                                                                                                                                                                                                                                                                                                      | YES<br>NO<br>DON'T KNOW <div style="float: right;"> <input type="checkbox"/><br/> <input type="checkbox"/><br/> <input type="checkbox"/> </div> |
| 3A160                                                                        | Was there any diagnosis of Heart Disease?                                                                                                                                                                                                                                                                                                                                                                                                                                            | YES<br>NO<br>DON'T KNOW <div style="float: right;"> <input type="checkbox"/><br/> <input type="checkbox"/><br/> <input type="checkbox"/> </div> |
| 3A170                                                                        | Was there any diagnosis of Diabetes?                                                                                                                                                                                                                                                                                                                                                                                                                                                 | YES<br>NO<br>DON'T KNOW <div style="float: right;"> <input type="checkbox"/><br/> <input type="checkbox"/><br/> <input type="checkbox"/> </div> |
| 3A180                                                                        | Was there any diagnosis of Asthma?                                                                                                                                                                                                                                                                                                                                                                                                                                                   | YES<br>NO<br>DON'T KNOW <div style="float: right;"> <input type="checkbox"/><br/> <input type="checkbox"/><br/> <input type="checkbox"/> </div> |
| 3A190                                                                        | Was there any diagnosis of Epilepsy?                                                                                                                                                                                                                                                                                                                                                                                                                                                 | YES<br>NO<br>DON'T KNOW <div style="float: right;"> <input type="checkbox"/><br/> <input type="checkbox"/><br/> <input type="checkbox"/> </div> |
| 3A200                                                                        | Was there any diagnosis of Cancer?                                                                                                                                                                                                                                                                                                                                                                                                                                                   | YES<br>NO<br>DON'T KNOW <div style="float: right;"> <input type="checkbox"/><br/> <input type="checkbox"/><br/> <input type="checkbox"/> </div> |

| NO.   | QUESTIONS AND FILTERS                                                    | CODING CATEGORIES                              |
|-------|--------------------------------------------------------------------------|------------------------------------------------|
| 3A210 | Was there any diagnosis of Chronic Obstructive Pulmonary Disease (COPD)? | YES<br>NO<br>DONT KNOW                         |
| 3A220 | Was there any diagnosis of Dementia?                                     | YES<br>NO<br>DONT KNOW                         |
| 3A230 | Was there any diagnosis of Depression?                                   | YES<br>NO<br>DONT KNOW                         |
| 3A240 | Was there any diagnosis of Stroke?                                       | YES<br>NO<br>DONT KNOW                         |
| 3A250 | Was there any diagnosis of Sickle Cell disease?                          | YES<br>NO<br>DONT KNOW                         |
| 3A260 | Was there any diagnosis of Kidney disease?                               | YES<br>NO<br>DONT KNOW                         |
| 3A270 | Was there any diagnosis of Liver disease?                                | YES<br>NO<br>DONT KNOW                         |
| 3A280 | Did s/he die during the wet season?                                      | YES<br>NO<br>DONT KNOW                         |
| 3A290 | Did s/he die during the dry season?                                      | YES<br>NO<br>DONT KNOW                         |
| 3A300 | For how long was s/he ill before s/he died?                              | NUMBER OF DAYS<br>NUMBER OF WEEKS<br>DONT KNOW |
| 3A310 | Did s/he die suddenly?                                                   | YES<br>NO<br>DONT KNOW                         |

2012 WHO VERBAL AUTOPSY [FORM 2]  
DEATH OF A CHILD AGED 4 WEEKS TO 14 YEARS

| NO.                                             | QUESTIONS AND FILTERS                                                                         | CODING CATEGORIES                       |
|-------------------------------------------------|-----------------------------------------------------------------------------------------------|-----------------------------------------|
| <b>SECTION 6. HISTORY OF INJURIES/ACCIDENTS</b> |                                                                                               |                                         |
| 3E100                                           | Did s/he suffer from any injury or accident that led to her/his death?                        | YES<br>NO<br>DON'T KNOW                 |
| 3E110                                           | + Did s/he suffer from a road traffic accident?                                               | YES<br>NO<br>DON'T KNOW                 |
| 3E120                                           | ++ Was s/he injured as a pedestrian/walking?                                                  | YES<br>NO<br>DON'T KNOW                 |
| 3E130                                           | ++ Was s/he injured as an occupant of a car vehicle?                                          | YES<br>NO<br>DON'T KNOW                 |
| 3E140                                           | ++ Was s/he injured as an occupant of a bus/heavy transport vehicle?                          | YES<br>NO<br>DON'T KNOW                 |
| 3E150                                           | ++ Was s/he injured as a driver or passenger of a motorcycle?                                 | YES<br>NO<br>DON'T KNOW                 |
| 3E160                                           | ++ Was s/he injured as a pedal cyclist?                                                       | YES<br>NO<br>DON'T KNOW                 |
| 3E170                                           | ++ Do you know anything about the counter-part that was hit during the road traffic accident? | YES<br>NO                               |
| 3E200                                           | +++ Was it a pedestrian?                                                                      | YES<br>NO<br>DON'T KNOW                 |
| 3E210                                           | +++ Was it a stationary object?                                                               | YES<br>NO<br>DON'T KNOW                 |
| 3E220                                           | +++ Was it a car vehicle?                                                                     | YES<br>NO<br>DON'T KNOW                 |
| 3E230                                           | +++ Was it a bus or heavy transport vehicle?                                                  | YES<br>NO<br>DON'T KNOW                 |
| 3E240                                           | +++ Was it a motor cycle?                                                                     | YES<br>NO<br>DON'T KNOW                 |
| 3E250                                           | +++ Was it a pedal cycle?                                                                     | YES<br>NO<br>DON'T KNOW                 |
| 3E260                                           | +++ Was it something else?                                                                    | YES (specify) _____<br>NO<br>DON'T KNOW |
| 3E300                                           | + Was s/he injured in a non-road transport accident?                                          | YES<br>NO<br>DON'T KNOW                 |
| 3E310                                           | ++ Was s/he injured in a fall?                                                                | YES<br>NO<br>DON'T KNOW                 |

| NO.   | QUESTIONS AND FILTERS                                                                                                                                                                 | CODING CATEGORIES       |                                                                                  |
|-------|---------------------------------------------------------------------------------------------------------------------------------------------------------------------------------------|-------------------------|----------------------------------------------------------------------------------|
| 3E320 | ++ Did s/he die of drowning?                                                                                                                                                          | YES<br>NO<br>DON'T KNOW | <input type="checkbox"/><br><input type="checkbox"/><br><input type="checkbox"/> |
| 3E330 | ++ Did s/he suffer from burns?                                                                                                                                                        | YES<br>NO<br>DON'T KNOW | <input type="checkbox"/><br><input type="checkbox"/><br><input type="checkbox"/> |
| 3E340 | ++ Did (s)he suffer from any plant/animal/insect bite or sting that led to ++ her/his death?                                                                                          | YES<br>NO<br>DON'T KNOW | <input type="checkbox"/><br><input type="checkbox"/><br><input type="checkbox"/> |
| 3E400 | +++ Was it a dog?                                                                                                                                                                     | YES<br>NO<br>DON'T KNOW | <input type="checkbox"/><br><input type="checkbox"/><br><input type="checkbox"/> |
| 3E410 | +++ Was it a snake?                                                                                                                                                                   | YES<br>NO<br>DON'T KNOW | <input type="checkbox"/><br><input type="checkbox"/><br><input type="checkbox"/> |
| 3E420 | +++ Was it an insect?                                                                                                                                                                 | YES<br>NO<br>DON'T KNOW | <input type="checkbox"/><br><input type="checkbox"/><br><input type="checkbox"/> |
| 3E500 | ++ Was s/he injured by a force of nature?                                                                                                                                             | YES<br>NO<br>DON'T KNOW | <input type="checkbox"/><br><input type="checkbox"/><br><input type="checkbox"/> |
| 3E510 | ++ Was there any poisoning?                                                                                                                                                           | YES<br>NO<br>DON'T KNOW | <input type="checkbox"/><br><input type="checkbox"/><br><input type="checkbox"/> |
| 3E520 | + Was s/he subject to violence or assault?                                                                                                                                            | YES<br>NO<br>DON'T KNOW | <input type="checkbox"/><br><input type="checkbox"/><br><input type="checkbox"/> |
| 3E530 | + Was the injury or accident intentionally inflicted by someone else?                                                                                                                 | YES<br>NO<br>DON'T KNOW | <input type="checkbox"/><br><input type="checkbox"/><br><input type="checkbox"/> |
| 3E600 | ++ Was s/he injured by a fire arm?                                                                                                                                                    | YES<br>NO<br>DON'T KNOW | <input type="checkbox"/><br><input type="checkbox"/><br><input type="checkbox"/> |
| 3E610 | ++ Was s/he injured from a stab, cut or pierce?                                                                                                                                       | YES<br>NO<br>DON'T KNOW | <input type="checkbox"/><br><input type="checkbox"/><br><input type="checkbox"/> |
| 3E620 | ++ Was s/he injured by machinery?                                                                                                                                                     | YES<br>NO<br>DON'T KNOW | <input type="checkbox"/><br><input type="checkbox"/><br><input type="checkbox"/> |
| 3E630 | ++ Was s/he struck by an animal or object?                                                                                                                                            | YES<br>NO<br>DON'T KNOW | <input type="checkbox"/><br><input type="checkbox"/><br><input type="checkbox"/> |
| 3E700 | + Do you think that s/he committed suicide?                                                                                                                                           | YES<br>NO<br>DON'T KNOW | <input type="checkbox"/><br><input type="checkbox"/><br><input type="checkbox"/> |
|       | <p>CHECK QUESTIONS 1A240 AND 1A250 FOR AGE AT DEATH:</p> <p>IF UNDER ONE YEAR <input type="checkbox"/> ↓</p> <p>IF ONE YEAR OR OLDER <input type="checkbox"/> → JUMP TO SECTION 8</p> |                         |                                                                                  |

| NO.                                                                            | QUESTIONS AND FILTERS                                          | CODING CATEGORIES             |                                                                                  |
|--------------------------------------------------------------------------------|----------------------------------------------------------------|-------------------------------|----------------------------------------------------------------------------------|
| <b>SECTION 7. SYMPTOMS AND SIGNS NOTED DURING THE FINAL ILLNESS OF INFANTS</b> |                                                                |                               |                                                                                  |
| 3D190                                                                          | Was the child born smaller than normal, weighing under 2.5 kg? | YES<br>NO<br>DON'T KNOW       | <input type="checkbox"/><br><input type="checkbox"/><br><input type="checkbox"/> |
| 3D210                                                                          | How many weeks was the pregnancy when the baby was born?       | NUMBER OF WEEKS<br>DON'T KNOW | <input type="text"/><br><input type="text"/>                                     |
| 3D390                                                                          | Did the child have bulging of the fontanelle?                  | YES<br>NO<br>DON'T KNOW       | <input type="checkbox"/><br><input type="checkbox"/><br><input type="checkbox"/> |
| 3D400                                                                          | Did the child have a sunken fontanelle?                        | YES<br>NO<br>DON'T KNOW       | <input type="checkbox"/><br><input type="checkbox"/><br><input type="checkbox"/> |

| 2012 WHO VERBAL AUTOPSY [FORM 2]<br>DEATH OF A CHILD AGED 4 WEEKS TO 14 YEARS |                                                                                         |                                                 |                                                                                                                                                             |
|-------------------------------------------------------------------------------|-----------------------------------------------------------------------------------------|-------------------------------------------------|-------------------------------------------------------------------------------------------------------------------------------------------------------------|
| NO.                                                                           | QUESTIONS AND FILTERS                                                                   | CODING CATEGORIES                               |                                                                                                                                                             |
| <b>SECTION 8. SYMPTOMS NOTED DURING THE FINAL ILLNESS FOR ALL CHILDREN</b>    |                                                                                         |                                                 |                                                                                                                                                             |
| 3D220                                                                         | Did the child have any noticeable malformation?                                         | YES<br>NO<br>DON'T KNOW                         | <input type="checkbox"/><br><input type="checkbox"/><br><input type="checkbox"/>                                                                            |
| 3D240                                                                         | + Did the child have a swelling or defect on the back?                                  | YES<br>NO<br>DON'T KNOW                         | <input type="checkbox"/><br><input type="checkbox"/><br><input type="checkbox"/>                                                                            |
| 3D250                                                                         | + Did the child have a very large head?                                                 | YES<br>NO<br>DON'T KNOW                         | <input type="checkbox"/><br><input type="checkbox"/><br><input type="checkbox"/>                                                                            |
| 3D260                                                                         | + Did the child have a very small head?                                                 | YES<br>NO<br>DON'T KNOW                         | <input type="checkbox"/><br><input type="checkbox"/><br><input type="checkbox"/>                                                                            |
| 3B100                                                                         | Did s/he have a fever?                                                                  | YES<br>NO<br>DON'T KNOW                         | <input type="checkbox"/><br><input type="checkbox"/><br><input type="checkbox"/>                                                                            |
| 3B110                                                                         | + For how long did s/he have a fever?                                                   | NUMBER OF DAYS<br>NUMBER OF WEEKS<br>DON'T KNOW | <input type="checkbox"/> <input type="checkbox"/><br><input type="checkbox"/> <input type="checkbox"/><br><input type="checkbox"/> <input type="checkbox"/> |
| 3B120                                                                         | + Did s/he have night sweats?                                                           | YES<br>NO<br>DON'T KNOW                         | <input type="checkbox"/><br><input type="checkbox"/><br><input type="checkbox"/>                                                                            |
| 3B130                                                                         | Did s/he have a cough?                                                                  | YES<br>NO<br>DON'T KNOW                         | <input type="checkbox"/><br><input type="checkbox"/><br><input type="checkbox"/>                                                                            |
| 3B140                                                                         | + For how long did s/he have a cough?                                                   | NUMBER OF DAYS<br>NUMBER OF WEEKS<br>DON'T KNOW | <input type="checkbox"/> <input type="checkbox"/><br><input type="checkbox"/> <input type="checkbox"/><br><input type="checkbox"/> <input type="checkbox"/> |
| 3B170                                                                         | + Did s/he make a whooping sound when coughing?                                         | YES<br>NO<br>DON'T KNOW                         | <input type="checkbox"/><br><input type="checkbox"/><br><input type="checkbox"/>                                                                            |
| 3B150                                                                         | + Was the cough productive with sputum?                                                 | YES<br>NO<br>DON'T KNOW                         | <input type="checkbox"/><br><input type="checkbox"/><br><input type="checkbox"/>                                                                            |
| 3B160                                                                         | + Did s/he cough out blood?                                                             | YES<br>NO<br>DON'T KNOW                         | <input type="checkbox"/><br><input type="checkbox"/><br><input type="checkbox"/>                                                                            |
| 3B180                                                                         | Did s/he have any breathing problem?                                                    | YES<br>NO<br>DON'T KNOW                         | <input type="checkbox"/><br><input type="checkbox"/><br><input type="checkbox"/>                                                                            |
| 3B190                                                                         | + Did s/he have fast breathing?                                                         | YES<br>NO<br>DON'T KNOW                         | <input type="checkbox"/><br><input type="checkbox"/><br><input type="checkbox"/>                                                                            |
| 3B200                                                                         | + + For how long did s/he have fast breathing?                                          | NUMBER OF DAYS<br>NUMBER OF WEEKS<br>DON'T KNOW | <input type="checkbox"/> <input type="checkbox"/><br><input type="checkbox"/> <input type="checkbox"/><br><input type="checkbox"/> <input type="checkbox"/> |
| 3B210                                                                         | + Did s/he have breathlessness?                                                         | YES<br>NO<br>DON'T KNOW                         | <input type="checkbox"/><br><input type="checkbox"/><br><input type="checkbox"/>                                                                            |
| 3B220                                                                         | + + For how long did s/he have breathlessness?                                          | NUMBER OF DAYS<br>NUMBER OF WEEKS<br>DON'T KNOW | <input type="checkbox"/> <input type="checkbox"/><br><input type="checkbox"/> <input type="checkbox"/><br><input type="checkbox"/> <input type="checkbox"/> |
| 3B230                                                                         | + + Was s/he unable to carry out daily routine activities due to<br>+ + breathlessness? | YES<br>NO<br>DON'T KNOW                         | <input type="checkbox"/><br><input type="checkbox"/><br><input type="checkbox"/>                                                                            |



| 2012 WHO VERBAL AUTOPSY [FORM 2]<br>DEATH OF A CHILD AGED 4 WEEKS TO 14 YEARS |                                                                                  |                                                 |                                                                                                                                                             |
|-------------------------------------------------------------------------------|----------------------------------------------------------------------------------|-------------------------------------------------|-------------------------------------------------------------------------------------------------------------------------------------------------------------|
| NO.                                                                           | QUESTIONS AND FILTERS                                                            | CODING CATEGORIES                               |                                                                                                                                                             |
| 3B240                                                                         | + + Was s/he breathless while lying flat?                                        | YES<br>NO<br>DON'T KNOW                         | <input type="checkbox"/><br><input type="checkbox"/><br><input type="checkbox"/>                                                                            |
| 3B250                                                                         | + Did you see the lower chest wall/ribs be pulled in as the child<br>+ breathed? | YES<br>NO<br>DON'T KNOW                         | <input type="checkbox"/><br><input type="checkbox"/><br><input type="checkbox"/>                                                                            |
| 3B260                                                                         | + Did s/he have noisy breathing (grunting or wheezing)?<br>+ DEMONSTRATE         | YES<br>NO<br>DON'T KNOW                         | <input type="checkbox"/><br><input type="checkbox"/><br><input type="checkbox"/>                                                                            |
| 3B270                                                                         | Did s/he have severe chest pain?                                                 | YES<br>NO<br>DON'T KNOW                         | <input type="checkbox"/><br><input type="checkbox"/><br><input type="checkbox"/>                                                                            |
| 3B280                                                                         | Did s/he have diarrhoea?                                                         | YES<br>NO<br>DON'T KNOW                         | <input type="checkbox"/><br><input type="checkbox"/><br><input type="checkbox"/>                                                                            |
| 3B290                                                                         | + For how long did s/he have diarrhoea?                                          | NUMBER OF DAYS<br>NUMBER OF WEEKS<br>DON'T KNOW | <input type="checkbox"/> <input type="checkbox"/><br><input type="checkbox"/> <input type="checkbox"/><br><input type="checkbox"/> <input type="checkbox"/> |
| 3B300                                                                         | + At any time during the final illness was there blood in the stools?            | YES<br>NO<br>DON'T KNOW                         | <input type="checkbox"/><br><input type="checkbox"/><br><input type="checkbox"/>                                                                            |
| 3B310                                                                         | Did s/he vomit?                                                                  | YES<br>NO<br>DON'T KNOW                         | <input type="checkbox"/><br><input type="checkbox"/><br><input type="checkbox"/>                                                                            |
| 3B320                                                                         | + Did s/he vomit "coffee grounds" or bright red/blood?                           | YES<br>NO<br>DON'T KNOW                         | <input type="checkbox"/><br><input type="checkbox"/><br><input type="checkbox"/>                                                                            |
| 3B330                                                                         | Did s/he have any abdominal problem?                                             | YES<br>NO<br>DON'T KNOW                         | <input type="checkbox"/><br><input type="checkbox"/><br><input type="checkbox"/>                                                                            |
| 3B340                                                                         | + Did s/he have severe abdominal pain?                                           | YES<br>NO<br>DON'T KNOW                         | <input type="checkbox"/><br><input type="checkbox"/><br><input type="checkbox"/>                                                                            |
| 3B350                                                                         | + + For how long before death did s/he have severe abdominal<br>+ + pain?        | NUMBER OF DAYS<br>NUMBER OF WEEKS<br>DON'T KNOW | <input type="checkbox"/> <input type="checkbox"/><br><input type="checkbox"/> <input type="checkbox"/><br><input type="checkbox"/> <input type="checkbox"/> |
| 3B360                                                                         | + Did s/he have a more than usual protruding abdomen?                            | YES<br>NO<br>DON'T KNOW                         | <input type="checkbox"/><br><input type="checkbox"/><br><input type="checkbox"/>                                                                            |
| 3B370                                                                         | + + For how long did s/he have a more than usual protruding<br>+ + abdomen?      | NUMBER OF DAYS<br>NUMBER OF WEEKS<br>DON'T KNOW | <input type="checkbox"/> <input type="checkbox"/><br><input type="checkbox"/> <input type="checkbox"/><br><input type="checkbox"/> <input type="checkbox"/> |
| 3B380                                                                         | + Did s/he have any lump inside the abdomen?                                     | YES<br>NO<br>DON'T KNOW                         | <input type="checkbox"/><br><input type="checkbox"/><br><input type="checkbox"/>                                                                            |
| 3B390                                                                         | + + For how long did s/he have the lump inside the abdomen?                      | NUMBER OF DAYS<br>NUMBER OF WEEKS<br>DON'T KNOW | <input type="checkbox"/> <input type="checkbox"/><br><input type="checkbox"/> <input type="checkbox"/><br><input type="checkbox"/> <input type="checkbox"/> |
| 3B400                                                                         | Did s/he have a severe headache?                                                 | YES<br>NO<br>DON'T KNOW                         | <input type="checkbox"/><br><input type="checkbox"/><br><input type="checkbox"/>                                                                            |
| 3B405                                                                         | Did s/he have a stiff or painful neck?                                           | YES<br>NO<br>DON'T KNOW                         | <input type="checkbox"/><br><input type="checkbox"/><br><input type="checkbox"/>                                                                            |
| 3B410                                                                         | + For how long did s/he have a stiff or painful neck?                            | NUMBER OF DAYS<br>NUMBER OF WEEKS<br>DON'T KNOW | <input type="checkbox"/> <input type="checkbox"/><br><input type="checkbox"/> <input type="checkbox"/><br><input type="checkbox"/> <input type="checkbox"/> |
| 3B420                                                                         | Did s/he have mental confusion?                                                  | YES<br>NO<br>DON'T KNOW                         | <input type="checkbox"/><br><input type="checkbox"/><br><input type="checkbox"/>                                                                            |

2012 WHO VERBAL AUTOPSY [FORM 2]  
DEATH OF A CHILD AGED 4 WEEKS TO 14 YEARS

| NO.   | QUESTIONS AND FILTERS                                                                                         | CODING CATEGORIES                                |
|-------|---------------------------------------------------------------------------------------------------------------|--------------------------------------------------|
| 3B430 | + For how long did s/he have mental confusion?                                                                | NUMBER OF DAYS<br>NUMBER OF MONTHS<br>DON'T KNOW |
| 3B440 | Was s/he unconscious for more than 24 hours?                                                                  | YES<br>NO<br>DON'T KNOW                          |
| 3B450 | + Did the unconsciousness start suddenly, quickly (at least within<br>+ a single day)?                        | YES<br>NO<br>DON'T KNOW                          |
| 3B460 | Did s/he have convulsions?                                                                                    | YES<br>NO<br>DON'T KNOW                          |
| 3B470 | + For how long did s/he have convulsions?                                                                     | NUMBER OF MINUTES<br>DON'T KNOW                  |
| 3B480 | + Did s/he become unconscious immediately after the convulsion?                                               | YES<br>NO<br>DON'T KNOW                          |
| 3B490 | Did s/he have any urine problems?                                                                             | YES<br>NO<br>DON'T KNOW                          |
| 3B500 | + Did s/he pass no urine at all?                                                                              | YES<br>NO<br>DON'T KNOW                          |
| 3B510 | + Did s/he go to urinate more often than usual?                                                               | YES<br>NO<br>DON'T KNOW                          |
| 3B520 | + During the final illness did s/he ever pass blood in the urine?                                             | YES<br>NO<br>DON'T KNOW                          |
| 3B530 | Did s/he have any skin problems?                                                                              | YES<br>NO<br>DON'T KNOW                          |
| 3B540 | + Did s/he have any ulcers, abscess or sores<br>+ anywhere except on the feet?                                | YES<br>NO<br>DON'T KNOW                          |
| 3B550 | + Did (s)he have any ulcers, abscess or sores on the feet<br>+ that were not also on other parts of the body? | YES<br>NO<br>DON'T KNOW                          |
| 3B560 | + During the illness that led to death, did s/he have any skin rash?                                          | YES<br>NO<br>DON'T KNOW                          |
| 3B570 | + + For how long did s/he have the skin rash?                                                                 | NUMBER OF DAYS<br>NUMBER OF WEEKS<br>DON'T KNOW  |
| 3B580 | + + Did s/he have measles rash?                                                                               | YES<br>NO<br>DON'T KNOW                          |
| 3B590 | + + Did s/he ever have shingles/herpes zoster?                                                                | YES<br>NO<br>DON'T KNOW                          |
| 3B600 | Did s/he have bleeding from the nose, mouth, or anus?                                                         | YES<br>NO<br>DON'T KNOW                          |
| 3B610 | Did s/he have noticeable weight loss?                                                                         | YES<br>NO<br>DON'T KNOW                          |
| 3B620 | + Was s/he severely thin or wasted?                                                                           | YES<br>NO<br>DON'T KNOW                          |

| 2012 WHO VERBAL AUTOPSY [FORM 2]<br>DEATH OF A CHILD AGED 4 WEEKS TO 14 YEARS                                                                                                                                                                                                                                                                                                                                                                                                     |                                                                                    |                         |                                                                                  |
|-----------------------------------------------------------------------------------------------------------------------------------------------------------------------------------------------------------------------------------------------------------------------------------------------------------------------------------------------------------------------------------------------------------------------------------------------------------------------------------|------------------------------------------------------------------------------------|-------------------------|----------------------------------------------------------------------------------|
| NO.                                                                                                                                                                                                                                                                                                                                                                                                                                                                               | QUESTIONS AND FILTERS                                                              | CODING CATEGORIES       |                                                                                  |
| 3B630                                                                                                                                                                                                                                                                                                                                                                                                                                                                             | Did s/he have mouth sores or white patches in the mouth or on the tongue?          | YES<br>NO<br>DON'T KNOW | <input type="checkbox"/><br><input type="checkbox"/><br><input type="checkbox"/> |
| 3B640                                                                                                                                                                                                                                                                                                                                                                                                                                                                             | Did s/he have stiffness of the whole body or was unable to open the mouth?         | YES<br>NO<br>DON'T KNOW | <input type="checkbox"/><br><input type="checkbox"/><br><input type="checkbox"/> |
| 3B650                                                                                                                                                                                                                                                                                                                                                                                                                                                                             | Did s/he have swelling (puffiness) of the face?                                    | YES<br>NO<br>DON'T KNOW | <input type="checkbox"/><br><input type="checkbox"/><br><input type="checkbox"/> |
| 3B660                                                                                                                                                                                                                                                                                                                                                                                                                                                                             | Did s/he have both feet swollen?                                                   | YES<br>NO<br>DON'T KNOW | <input type="checkbox"/><br><input type="checkbox"/><br><input type="checkbox"/> |
| 3B670                                                                                                                                                                                                                                                                                                                                                                                                                                                                             | Did s/he have any lumps?                                                           | YES<br>NO<br>DON'T KNOW | <input type="checkbox"/><br><input type="checkbox"/><br><input type="checkbox"/> |
| 3B680                                                                                                                                                                                                                                                                                                                                                                                                                                                                             | + Did s/he have a lumps or lesions in the mouth?                                   | YES<br>NO<br>DON'T KNOW | <input type="checkbox"/><br><input type="checkbox"/><br><input type="checkbox"/> |
| 3B690                                                                                                                                                                                                                                                                                                                                                                                                                                                                             | + Did s/he have any lumps on the neck?                                             | YES<br>NO<br>DON'T KNOW | <input type="checkbox"/><br><input type="checkbox"/><br><input type="checkbox"/> |
| 3B700                                                                                                                                                                                                                                                                                                                                                                                                                                                                             | + Did s/he have any lumps on the armpit?                                           | YES<br>NO<br>DON'T KNOW | <input type="checkbox"/><br><input type="checkbox"/><br><input type="checkbox"/> |
| 3B710                                                                                                                                                                                                                                                                                                                                                                                                                                                                             | + Did s/he have any lumps on the groin?                                            | YES<br>NO<br>DON'T KNOW | <input type="checkbox"/><br><input type="checkbox"/><br><input type="checkbox"/> |
| 3B730                                                                                                                                                                                                                                                                                                                                                                                                                                                                             | Did s/he have paralysis of one side of the body?                                   | YES<br>NO<br>DON'T KNOW | <input type="checkbox"/><br><input type="checkbox"/><br><input type="checkbox"/> |
| 3B740                                                                                                                                                                                                                                                                                                                                                                                                                                                                             | Did s/he have difficulty or pain while swallowing liquids?                         | YES<br>NO<br>DON'T KNOW | <input type="checkbox"/><br><input type="checkbox"/><br><input type="checkbox"/> |
| 3B750                                                                                                                                                                                                                                                                                                                                                                                                                                                                             | Did s/he have yellow discoloration of the eyes?                                    | YES<br>NO<br>DON'T KNOW | <input type="checkbox"/><br><input type="checkbox"/><br><input type="checkbox"/> |
| 3B760                                                                                                                                                                                                                                                                                                                                                                                                                                                                             | Did her/his hair colour change to reddish or yellowish?                            | YES<br>NO<br>DON'T KNOW | <input type="checkbox"/><br><input type="checkbox"/><br><input type="checkbox"/> |
| 3B770                                                                                                                                                                                                                                                                                                                                                                                                                                                                             | Did s/he look pale (thinning/lack of blood) or have pale palms, eyes or nail beds? | YES<br>NO<br>DON'T KNOW | <input type="checkbox"/><br><input type="checkbox"/><br><input type="checkbox"/> |
| 3B780                                                                                                                                                                                                                                                                                                                                                                                                                                                                             | Did s/he have sunken eyes?                                                         | YES<br>NO<br>DON'T KNOW | <input type="checkbox"/><br><input type="checkbox"/><br><input type="checkbox"/> |
| 3D270                                                                                                                                                                                                                                                                                                                                                                                                                                                                             | Was the child not growing normally?                                                | YES<br>NO<br>DON'T KNOW | <input type="checkbox"/><br><input type="checkbox"/><br><input type="checkbox"/> |
| 3B790                                                                                                                                                                                                                                                                                                                                                                                                                                                                             | Did (s)he drink a lot more water than usual?                                       | YES<br>NO<br>DON'T KNOW | <input type="checkbox"/><br><input type="checkbox"/><br><input type="checkbox"/> |
| <b>CHECK QUESTIONS 1A110, 1A240 AND 1A250 FOR SEX AND AGE AT DEATH:</b><br><br><div style="display: flex; justify-content: space-around; align-items: center;"> <div style="text-align: center;">             IF FEMALE<br/>BETWEEN 12 - 14 YEARS<br/> <input type="checkbox"/><br/>             ↓           </div> <div style="text-align: center;">             IF MALE OR FEMALE<br/>UNDER 12 YEARS<br/> <input type="checkbox"/> → JUMP TO SECTION 10           </div> </div> |                                                                                    |                         |                                                                                  |

2012 WHO VERBAL AUTOPSY [FORM 2]  
DEATH OF A CHILD AGED 4 WEEKS TO 14 YEARS

| NO.                                                            | QUESTIONS AND FILTERS                                                                                  | CODING CATEGORIES                                     |
|----------------------------------------------------------------|--------------------------------------------------------------------------------------------------------|-------------------------------------------------------|
| <b>SECTION 9. SYMPTOMS AND SIGNS ASSOCIATED WITH PREGNANCY</b> |                                                                                                        |                                                       |
| 3C100                                                          | Was she neither pregnant, nor delivered, within 6 weeks of her death?<br><br><b>OR</b>                 | YES skip pregnancy section if YES<br>NO<br>DON'T KNOW |
| 3C110                                                          | Was she pregnant at the time of death?<br><br><b>OR</b>                                                | YES<br>NO<br>DON'T KNOW                               |
| 3C120                                                          | Did she die within 6 weeks of giving birth?<br><br><b>OR</b>                                           | YES<br>NO<br>DON'T KNOW                               |
| 3C130                                                          | Did she die within 6 weeks of a pregnancy that lasted less than 6 months?                              | YES<br>NO<br>DON'T KNOW                               |
| 3C200                                                          | + Did she die within 24 hours after delivery?                                                          | YES<br>NO<br>DON'T KNOW                               |
| 3C210                                                          | + Did she die during labour, but undelivered?                                                          | YES<br>NO<br>DON'T KNOW                               |
| 3C220                                                          | + Was she breastfeeding at death?                                                                      | YES<br>NO<br>DON'T KNOW                               |
| 3C230                                                          | + How many births, including stillbirths, did she have<br>+ before this baby?                          | NUMBER OF BIRTHS/STILLBIRTHS<br>DON'T KNOW            |
| 3C240                                                          | + Did she have any previous C-section?                                                                 | YES<br>NO<br>DON'T KNOW                               |
| 3C250                                                          | + Did she die during or after a multiple pregnancy?                                                    | YES<br>NO<br>DON'T KNOW                               |
| 3C260                                                          | + During pregnancy, did she suffer from high blood pressure?                                           | YES<br>NO<br>DON'T KNOW                               |
| 3C270                                                          | + Did she have foul smelling vaginal discharge during pregnancy<br>+ or after delivery?                | YES<br>NO<br>DON'T KNOW                               |
| 3C280                                                          | + During the last 3 months of pregnancy, did she suffer from<br>+ convulsions?                         | YES<br>NO<br>DON'T KNOW                               |
| 3C290                                                          | + During the last 3 months of pregnancy, did she suffer from<br>+ blurred vision?                      | YES<br>NO<br>DON'T KNOW                               |
| 3C300                                                          | + Did she give birth to a live, healthy baby within 6 weeks of death?                                  | YES<br>NO<br>DON'T KNOW                               |
| 3C310                                                          | + Was there any vaginal bleeding during pregnancy or<br>+ after delivery?                              | YES<br>NO<br>DON'T KNOW                               |
| 3C320                                                          | + + Was there vaginal bleeding during the first 6 months<br>+ + of pregnancy?                          | YES<br>NO<br>DON'T KNOW                               |
| 3C330                                                          | + + Was there vaginal bleeding during the last 3 months of<br>+ + pregnancy but before labour started? | YES<br>NO<br>DON'T KNOW                               |

| 2012 WHO VERBAL AUTOPSY [FORM 2]<br>DEATH OF A CHILD AGED 4 WEEKS TO 14 YEARS |                                                                                              |                         |
|-------------------------------------------------------------------------------|----------------------------------------------------------------------------------------------|-------------------------|
| NO.                                                                           | QUESTIONS AND FILTERS                                                                        | CODING CATEGORIES       |
| 3C340                                                                         | + + Was there excessive vaginal bleeding during labour?                                      | YES<br>NO<br>DON'T KNOW |
| 3C350                                                                         | + + Was there excessive vaginal bleeding after delivering the baby?                          | YES<br>NO<br>DON'T KNOW |
| 3C360                                                                         | + Was the placenta not completely delivered?                                                 | YES<br>NO<br>DON'T KNOW |
| 3C365                                                                         | + Did she deliver or try to deliver an abnormally positioned baby?                           | YES<br>NO<br>DON'T KNOW |
| 3C370                                                                         | + Was she in labour for unusually long (more than 24 hours)?                                 | YES<br>NO<br>DON'T KNOW |
| 3C380                                                                         | Did she attempt to terminate the pregnancy?                                                  | YES<br>NO<br>DON'T KNOW |
| 3C390                                                                         | + Did she recently have a pregnancy that ended in<br>+ an abortion (spontaneous or induced)? | YES<br>NO<br>DON'T KNOW |
| 3C400                                                                         | + Did she give birth in a health facility?                                                   | YES<br>NO<br>DON'T KNOW |
| 3C410                                                                         | + Did she give birth at home?                                                                | YES<br>NO<br>DON'T KNOW |
| 3C420                                                                         | Did she give birth elsewhere, e.g. on the way to a facility?                                 | YES<br>NO<br>DON'T KNOW |
| 3C430                                                                         | + Did she receive professional assistance for the delivery?                                  | YES<br>NO<br>DON'T KNOW |
| 3C440                                                                         | + Did she have an operation to remove her uterus shortly<br>+ before death?                  | YES<br>NO<br>DON'T KNOW |
| 3C450                                                                         | + Did she have a normal vaginal delivery?                                                    | YES<br>NO<br>DON'T KNOW |
| 3C460                                                                         | + Did she have an assisted delivery, with forceps/vacuum?                                    | YES<br>NO<br>DON'T KNOW |
| 3C470                                                                         | + Was it a delivery with caesarean section?                                                  | YES<br>NO<br>DON'T KNOW |
| 3C480                                                                         | + Was the baby born more than one month early?                                               | YES<br>NO<br>DON'T KNOW |

| 2012 WHO VERBAL AUTOPSY [FORM 2]<br>DEATH OF A CHILD AGED 4 WEEKS TO 14 YEARS |                                                                                                                                                                                    |                         |                                                                                  |
|-------------------------------------------------------------------------------|------------------------------------------------------------------------------------------------------------------------------------------------------------------------------------|-------------------------|----------------------------------------------------------------------------------|
| NO                                                                            | QUESTIONS AND FILTERS                                                                                                                                                              | CODING CATEGORIES       |                                                                                  |
| <b>SECTION 10. TREATMENT AND HEALTH SERVICE USE FOR THE FINAL ILLNESS</b>     |                                                                                                                                                                                    |                         |                                                                                  |
| 3G100                                                                         | Was s/he adequately vaccinated?                                                                                                                                                    | YES<br>NO<br>DON'T KNOW | <input type="checkbox"/><br><input type="checkbox"/><br><input type="checkbox"/> |
| 3G110                                                                         | Did s/he receive any treatment for the illness that led to death?                                                                                                                  | YES<br>NO<br>DON'T KNOW | <input type="checkbox"/><br><input type="checkbox"/><br><input type="checkbox"/> |
| 3G120                                                                         | + Did s/he receive oral rehydration salts?                                                                                                                                         | YES<br>NO<br>DON'T KNOW | <input type="checkbox"/><br><input type="checkbox"/><br><input type="checkbox"/> |
| 3G130                                                                         | + Did s/he receive (or needed) intravenous fluids (drip) treatment?                                                                                                                | YES<br>NO<br>DON'T KNOW | <input type="checkbox"/><br><input type="checkbox"/><br><input type="checkbox"/> |
| 3G140                                                                         | + Did s/he receive (or needed) a blood transfusion?                                                                                                                                | YES<br>NO<br>DON'T KNOW | <input type="checkbox"/><br><input type="checkbox"/><br><input type="checkbox"/> |
| 3G150                                                                         | + Did s/he receive (or needed) treatment/food through a tube passed<br>+ through the nose?                                                                                         | YES<br>NO<br>DON'T KNOW | <input type="checkbox"/><br><input type="checkbox"/><br><input type="checkbox"/> |
| 3G160                                                                         | + Did s/he receive (or needed) injectable (IV or IM) antibiotics?                                                                                                                  | YES<br>NO<br>DON'T KNOW | <input type="checkbox"/><br><input type="checkbox"/><br><input type="checkbox"/> |
| 3G170                                                                         | + Did s/he have (or needed) an operation for the illness?                                                                                                                          | YES<br>NO<br>DON'T KNOW | <input type="checkbox"/><br><input type="checkbox"/><br><input type="checkbox"/> |
| 3G180                                                                         | + + Did s/he have the operation within 1 month before death?                                                                                                                       | YES<br>NO<br>DON'T KNOW | <input type="checkbox"/><br><input type="checkbox"/><br><input type="checkbox"/> |
| 3G190                                                                         | + Was s/he discharged from the hospital very ill?                                                                                                                                  | YES<br>NO<br>DON'T KNOW | <input type="checkbox"/><br><input type="checkbox"/><br><input type="checkbox"/> |
| <b>SECTION 11. BACKGROUND</b>                                                 |                                                                                                                                                                                    |                         |                                                                                  |
| 4A100                                                                         | In the final days before death, did s/he travel to a hospital or<br>health facility?                                                                                               | YES<br>NO<br>DON'T KNOW | <input type="checkbox"/><br><input type="checkbox"/><br><input type="checkbox"/> |
| 4A110                                                                         | + Did s/he use motorised transport to get to the hospital or<br>+ health facility?                                                                                                 | YES<br>NO<br>DON'T KNOW | <input type="checkbox"/><br><input type="checkbox"/><br><input type="checkbox"/> |
| 4A120                                                                         | + Were there any problems during admission to the hospital or<br>+ health facility?                                                                                                | YES<br>NO<br>DON'T KNOW | <input type="checkbox"/><br><input type="checkbox"/><br><input type="checkbox"/> |
| 4A130                                                                         | + Were there any problems with the way (s)he was treated (medical treatment,<br>+ procedures, inter-personal attitudes, respect, dignity) in the<br>+ hospital or health facility? | YES<br>NO<br>DON'T KNOW | <input type="checkbox"/><br><input type="checkbox"/><br><input type="checkbox"/> |
| 4A140                                                                         | + Were there any problems getting medications, or diagnostic tests<br>+ in the hospital or health facility?                                                                        | YES<br>NO<br>DON'T KNOW | <input type="checkbox"/><br><input type="checkbox"/><br><input type="checkbox"/> |
| 4A150                                                                         | Does it take more than 2 hours to get to the nearest hospital or<br>health facility from the deceased's household?                                                                 | YES<br>NO<br>DON'T KNOW | <input type="checkbox"/><br><input type="checkbox"/><br><input type="checkbox"/> |
| 4A160                                                                         | In the final days before death, were there any doubts about whether<br>medical care was needed?                                                                                    | YES<br>NO<br>DON'T KNOW | <input type="checkbox"/><br><input type="checkbox"/><br><input type="checkbox"/> |

| NO.   | QUESTIONS AND FILTERS                                                                                    | CODING CATEGORIES                                                                                                         |
|-------|----------------------------------------------------------------------------------------------------------|---------------------------------------------------------------------------------------------------------------------------|
| 4A170 | In the final days before death, was traditional medicine used?                                           | YES<br>NO<br>DON'T KNOW <div> <input type="checkbox"/><br/> <input type="checkbox"/><br/> <input type="checkbox"/> </div> |
| 4A180 | In the final days before death, did anyone use a telephone or cell phone to call for help?               | YES<br>NO<br>DON'T KNOW <div> <input type="checkbox"/><br/> <input type="checkbox"/><br/> <input type="checkbox"/> </div> |
| 4A190 | Over the course of illness, did the total costs of care and treatment prohibit other household payments? | YES<br>NO<br>DON'T KNOW <div> <input type="checkbox"/><br/> <input type="checkbox"/><br/> <input type="checkbox"/> </div> |

5A100

**INTERVIEWER'S OBSERVATIONS**

TO BE FILLED IN AFTER COMPLETING INTERVIEW

---

---

---

---

---

---

COMMENTS ON SPECIFIC QUESTIONS:

---

---

---

---

---

ANY OTHER COMMENTS:

---

---

---

---

---

**SUPERVISOR'S OBSERVATIONS**

---

---

---

---

---

---

---

NAME OF THE SUPERVISOR: \_\_\_\_\_ DATE: \_\_\_\_\_
