# Supplementary material for: Causes of under-five child Mortality in Tigray Region, North Ethiopia A retrospective verbal autopsy study
Source: Research Square preprint supplement (doi:10.21203/rs.3.rs-7545655/v1), 2025-10-23
Supplement: Supplementary file 1 [file d88c599f717aca322e22c778.docx]

| Code | Post neonatal child (N=255) | N | % | | Rank |
| --- | --- | --- | --- | --- | --- |
| VAs-01 | **Infectious and parasitic diseases** | **213** | | **80.4** |  |
| VAs-01.02 | Acute respiratory infection, including pneumonia | 49 | | 18.5 | 3 |
| VAs-01.03 | HIV/AIDS related death | 23 | | 8.7 | 5 |
| VAs-01.04 | Diarrheal diseases | 61 | | 23.0 | 1 |
| VAs-01.05 | Malaria | 53 | | 20.0 | 2 |
| VAs-01.07 | Meningitis and encephalitis | 19 | | 7.2 | 6 |
| VAs-01.09 | Pulmonary tuberculosis | 2 | | 0.8 | 10 |
| VAs-01.99 | Other and unspecified infectious disease | 6 | | 2.3 | 8 |
| VAs-06 | **Gastrointestinal disorder** |  | |  |  |
| VAs-06.01 | Acute abdomen | 7 | | 2.6 | 7 |
| VAs-07 | **Renal disorder** |  | |  |  |
| VAs-07.01 | Renal failure | 1 | | 0.4 | 11 |
| VAs-08 | **Mental and nervous system disorder** |  | |  |  |
| VAs-08.01 | Epilepsy | 1 | | 0.4 | 11 |
| VAs-03 | **Nutritional and endocrine disorders** | **26** | | **9.9** |  |
| VAs-03.02 | Severe malnutrition | 24 | | 9.1 | 4 |
| VAs-03.03 | Diabetes mellitus | 2 | | 0.8 | 10 |
| VAs-12 | **External causes of death** | **17** | | **6.4** |  |
| VAs-12.01 | Road traffic accident | 2 | | 0.8 | 10 |
| VAs-12.04 | Accidental drowning and submersion | 2 | | 0.8 | 10 |
| VAs-12.06 | Contact with venomous animals and plants | 4 | | 1.5 | 9 |
| VAs-12.07 | Accidental poisoning and exposure to noxious substance | 2 | | 0.8 | 10 |
| VAs-12.99 | Other and unspecified external cause of death | 7 | | 2.6 | 7 |
| VAs-10 | **Neonatal causes of death (N=138)** | **128** | | 100% |  |
| VAs-10.01 | Prematurity | 24 | | 18.8 | 3 |
| VAs-10.02 | Birth asphyxia | 16 | | 12.5 | 4 |
| VAs-10.03 | Neonatal pneumonia | 46 | | 35.9 | 1 |
| VAs-10.04 | Neonatal sepsis | 32 | | 25.0 | 2 |
| VAs-10.06 | Congenital malformation | 4 | | 3.1 | 6 |
| VAs-10.99 | Other unspecified perinatal cause of death | 6 | | 4.7 | 5 |
